# Supplementary material for: BestCRM: An Exhaustive Search for Optimal Cis-Regulatory Modules in Promoters Accelerated by the Multidimensional Hash Function
Source: MDPI journal article supplement (doi:10.3390/ijms25031903), 2024-02-05
Supplement: s1 [file s1]

# Supplementary information for the article: “BestCRM: exhaustive search for optimal Cis-Regulatory Modules in promoters accelerated by multidimensional hash function”.

Igor V. Deyneko

## Representation of a CRM

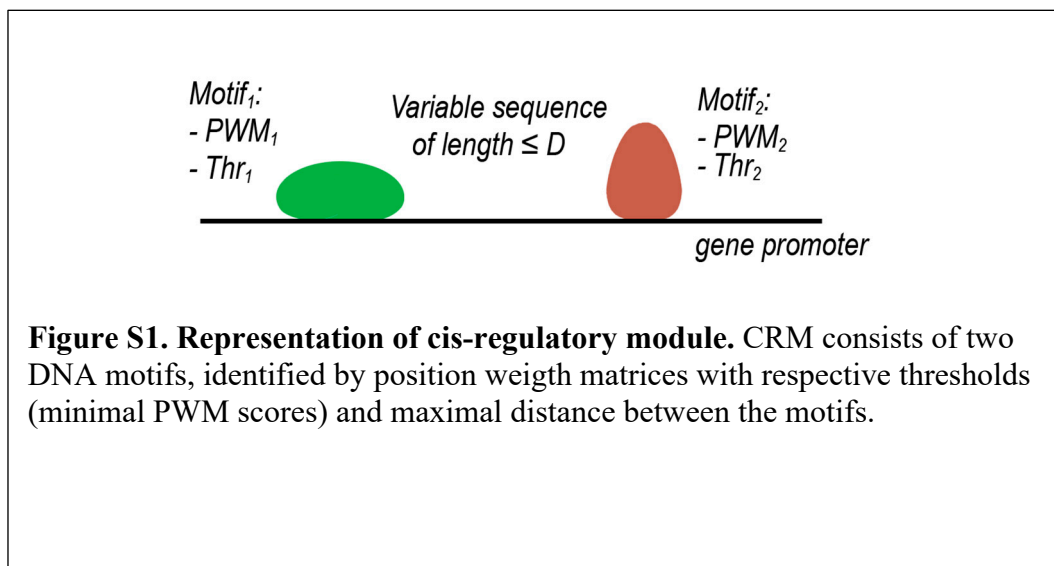

## Building the hash function

### For each pair of TFs:

- Find single motifs in both datasets for threshold values (1.0 – 0.3). 0.3 is used as a sufficiently low threshold, since for all PWMs the threshold 0.3 yields approximately one motif per 25 nucleotides on average.
- build the hash function for positive and negative sets.

- define an area where boundary conditions on minimal and maximal coverage of positive and negative sets are fulfilled.
- Maximize the ratio  $C_{CRM}^+/C_{CRM}^-$  within the defined parameters area.
- Output CRM if  $\max(C_{CRM}^+/C_{CRM}^-)$  is above the value defined by user (default 1.5)

## The hash function

The major part of the algorithm is the building of a hash function of distribution of motif pairs on positive and negative promoters. The idea is to make such a function, which shows the portion of sequences in a set that have at least one module depending on PWM thresholds and distance in-between. Mathematically it can be defined as follows.

First we need an indicator function:

$$I(seq, x, y, D) = \begin{cases} 1, & \text{iff } \exists(m_1, m_2) \mid m_1, m_2 \in seq, PWM_1(m_1) \geq x, PWM_2(m_2) \geq y, |(m_1, m_2)| \leq D, \\ 0, & \text{otherwise.} \end{cases},$$

where  $seq$  is a DNA sequence,  $x, y$  – thresholds for PWM<sub>1</sub>, PWM<sub>2</sub>,  $m_1, m_2$  – DNA motifs,  $L$  – maximum distance between motifs.

Then, the hash function will be:

$$H(x, y) = \sum_{seq=1 \dots N} I(seq, x, y) / N,$$

where  $N$  is a number of DNA sequences in a set. This way  $H^+(x, y)$  and  $H^-(x, y)$  is defined for positive and negative promoter sets.

This function shows the portion of sequences that contain at least one pair of motifs  $m_1, m_2$  defined by position weight matrices PWM<sub>1</sub>, PWM<sub>2</sub> with scores higher than  $x, y$  respectively. The distance between the motifs is restricted by value  $D$ .

One important property of the hash function is its continuous grow from zero to one along  $x, y$  and  $D$  axes. Indeed, if the modules is found for  $(x, y, D)$ , then it will be found also for any scores

lower than  $x$ ,  $y$ , or distances higher than  $D$ . In other words, the number of modules will only grow with the decrease of scores and an increase of the allowed distance. This property is used for an efficient implementation of the search strategy.

On the figure S2 there is another example for factors SpoOA and PerR from Prodoric database.

**Figure S2.** The hash functions  $H^+(x,y)$  (green) and  $H^-(x,y)$  (blue) on positive and negative set of promoters respectively. Grey planes indicate default boundary conditions  $C_{\min}=0.75$  (upper) and  $C_{\max}=0.5$  (lower). Used PWM matrices are SpoOA and PerR from Prodoric database. The area where  $H^+(x,y)$  and  $H^-(x,y)$  are above and below respective boundary conditions is marked in red on both grey planes and as a projection on the bottom (solid red). It represents the area of possible solutions and covers only  $\sim 3\%$  of the initial parameter variation space.

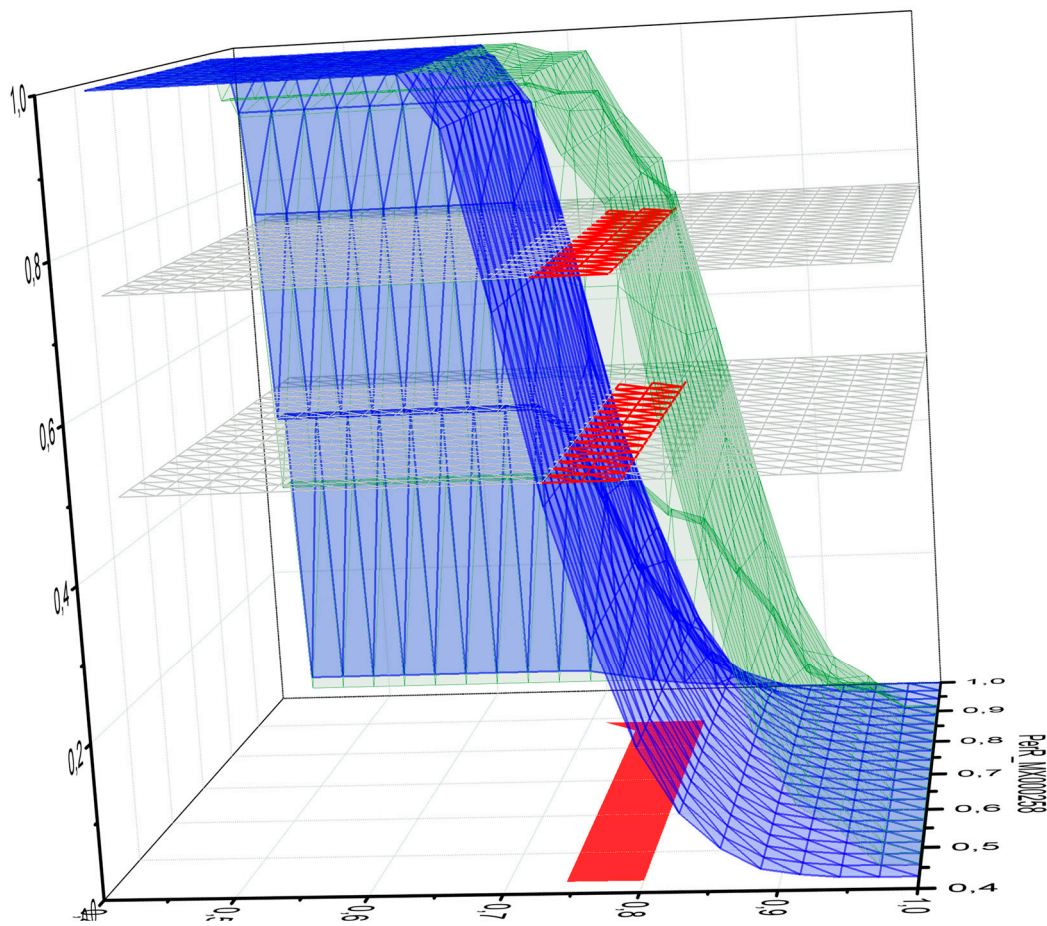

## Maximization procedure

The function, which shows the preference of a motif pair for positive set against the negative is given by the ratio:

$$\frac{H^+(x, y, D)}{H^-(x, y, D)} \rightarrow \max_{0 \leq x, y \leq 1}, \text{ giving that } H^+(x, y, D) \geq C_{\min}^+, H^-(x, y, D) \leq C_{\max}^-$$

An exhaustive search against all possible combinations of PWM thresholds and distance D is optimized via significant reduction of the search space, which is done in several steps. Here we simplify the explanation by considering only PWM thresholds.

The idea behind the first step is to locate a square in (x,y) plane where coverage of the positive set is equal or higher than the required minimum. This can be done with linear complexity by checking values along x axis and finding the minimum  $x^+$  so that  $H^+(x^+, 1) \geq C_{\min}$ . Similarly the program finds minimum  $y^+$ , so that  $H^+(1, y^+) \geq C_{\min}$ . As a result the possible solution space can be reduced to the square defined by the diagonal  $[(x^+, y^+); (1, 1)]$ .

The same way a square with a diagonal  $[(0, 0); (x^-, y^-)]$  is defined for negative set, where  $H^-(x^-, 0) \leq C_{\max}$  and  $H^-(0, y^-) \leq C_{\max}$ . Since we require that both boundary conditions are met the final search space is reduce to the square with diagonal  $[(x^+, y^+); (x^-, y^-)]$ . In reality, the actual area is even smaller, since it may have more complex shape inside the defined square

As it is evident from the figure S2, the suggested optimization procedure significantly reduces the search solutions area. In the presented example, it is only ~3% from the entire square  $(0 \dots 1; 0 \dots 1)$ .

Of note, if either  $x^- < x^+$  or  $y^- < y^+$ , than there is no possible solution for this motif pair. In other words, this particular module is too frequent on negative sequences and/or too rare on the positive.

At the second step, the search space can be further reduced by recursive checking of the adjacent points starting from one of the boundary values  $(x^+, 1)$  or  $(1, y^+)$  for the positive dataset. So that if a point  $(x_i, y_i)$  fulfils the criteria  $H^+(x_i, y_i) \geq C_{\min}^+$ , than it is required to check two adjacent points:

$$(x_i, y_i) \rightarrow \begin{cases} \text{if } H^+(x_i + \Delta x, y_i) \geq C_{\min}^+ \\ \text{if } H^+(x_i, y_i + \Delta y) \geq C_{\min}^+ \end{cases}.$$

Once the criteria are met the program recursively continues with the new point. Similarly, it is done for the negative set of DNA sequences. This forms an accurate shape of parameters where optimization should be performed. In our example on Figure S2, this area (solid red) occupies only ~3% of the initial search space.

Maximization of the ratio  $\frac{H^+(x, y, D)}{H^-(x, y, D)} \rightarrow \max_{0 \leq x, y \leq 1}$  is done by the exhaustive search for all x,y inside the identified shape and for all distances D up to 200 bp (default).

# Results of comparative testing

Figure S3. Comparison on datasets from Klepper, K., et al. 2008.

A. Average performance over all datasets.

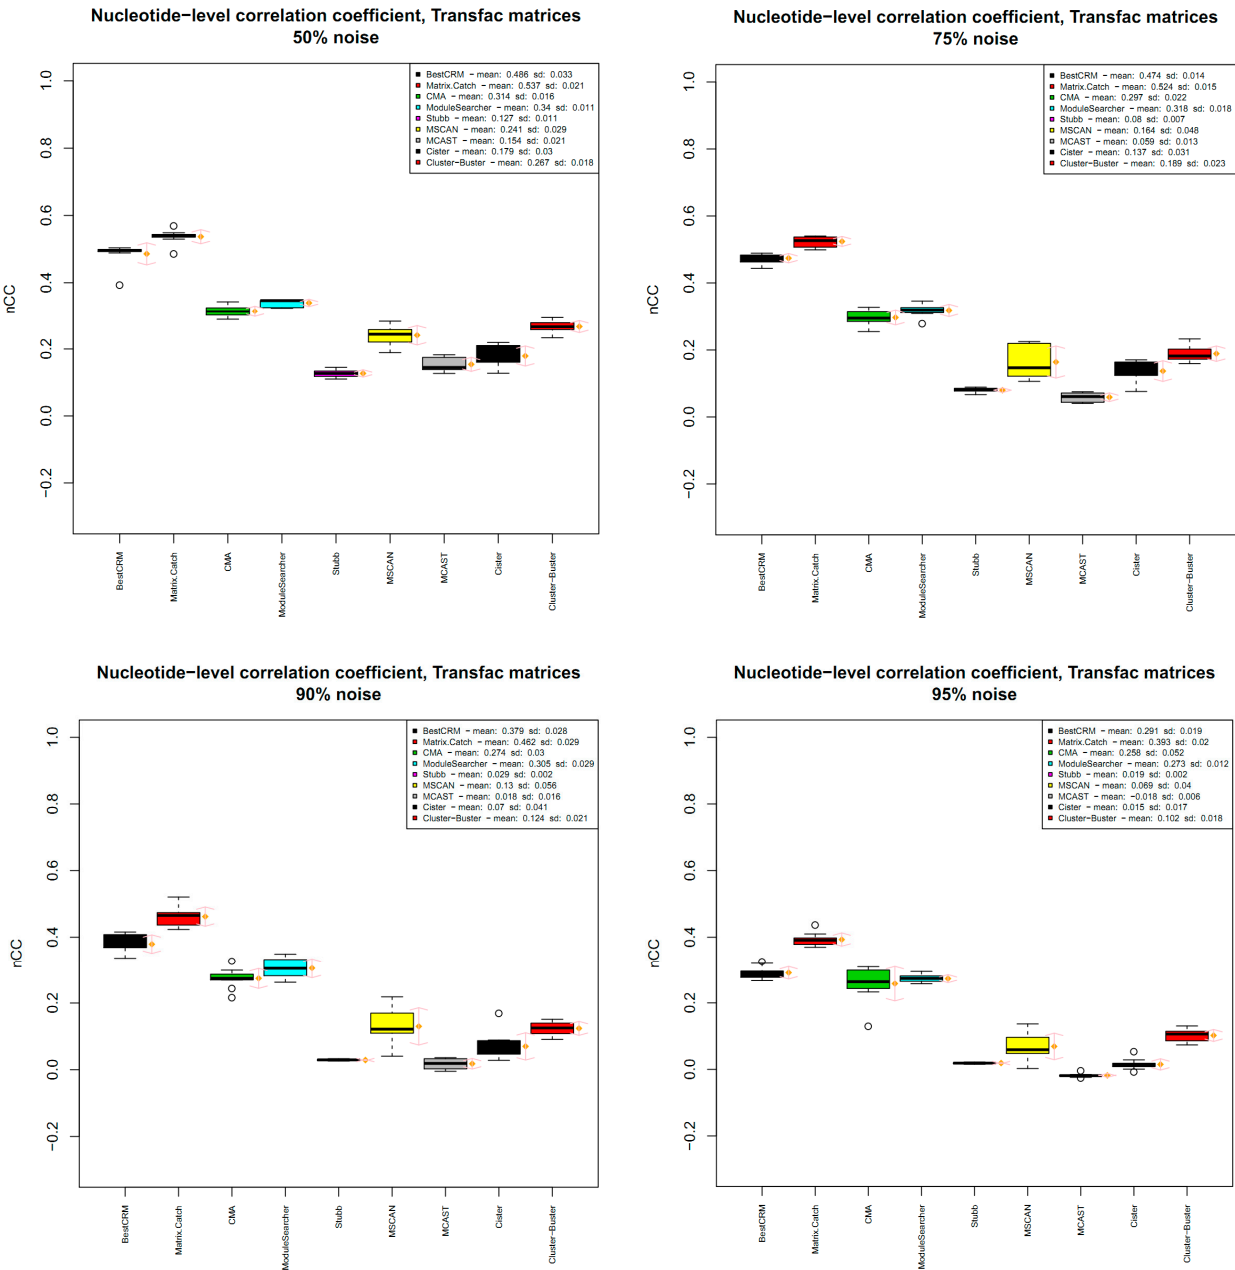

**Figure S3 (Continued).**

B. Different performance characteristics based on nucleotide correlation coefficient (CC – first column). All performance measures have values from 0 to 1 (y-axis).

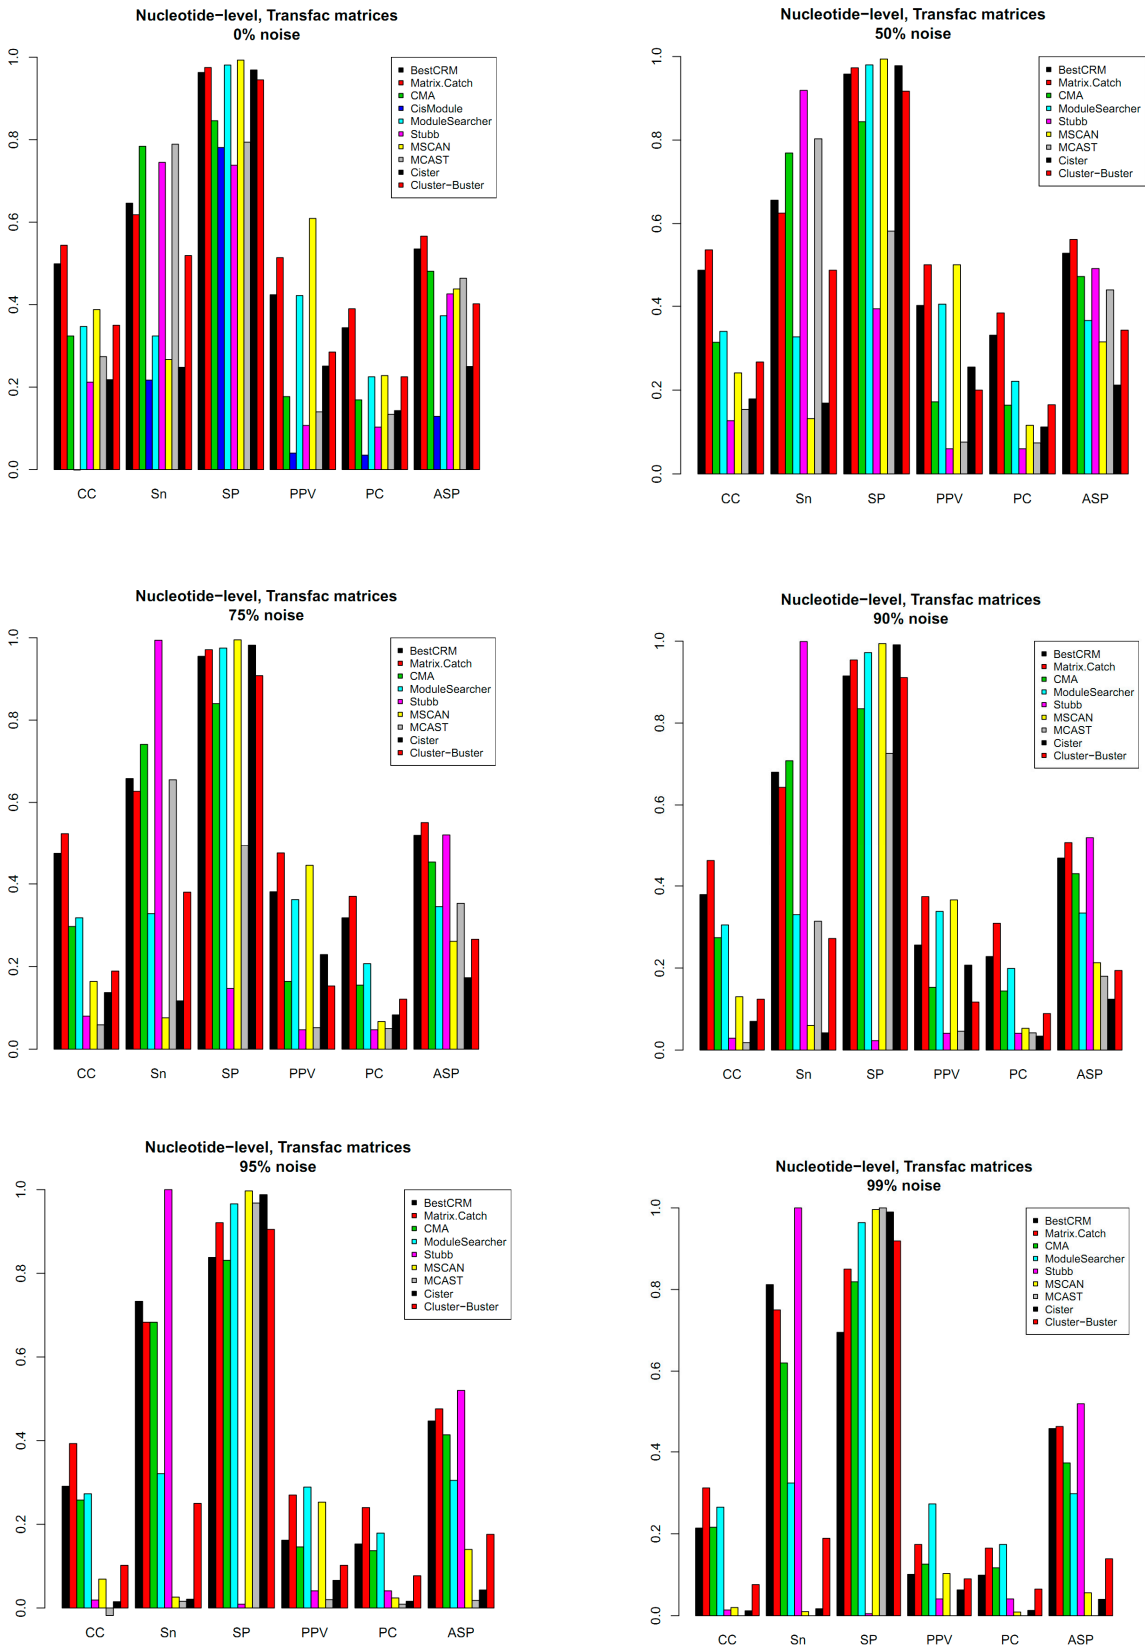

**Figure S3 (Continued).**

**C. Performance in different classes of transcription factors.**

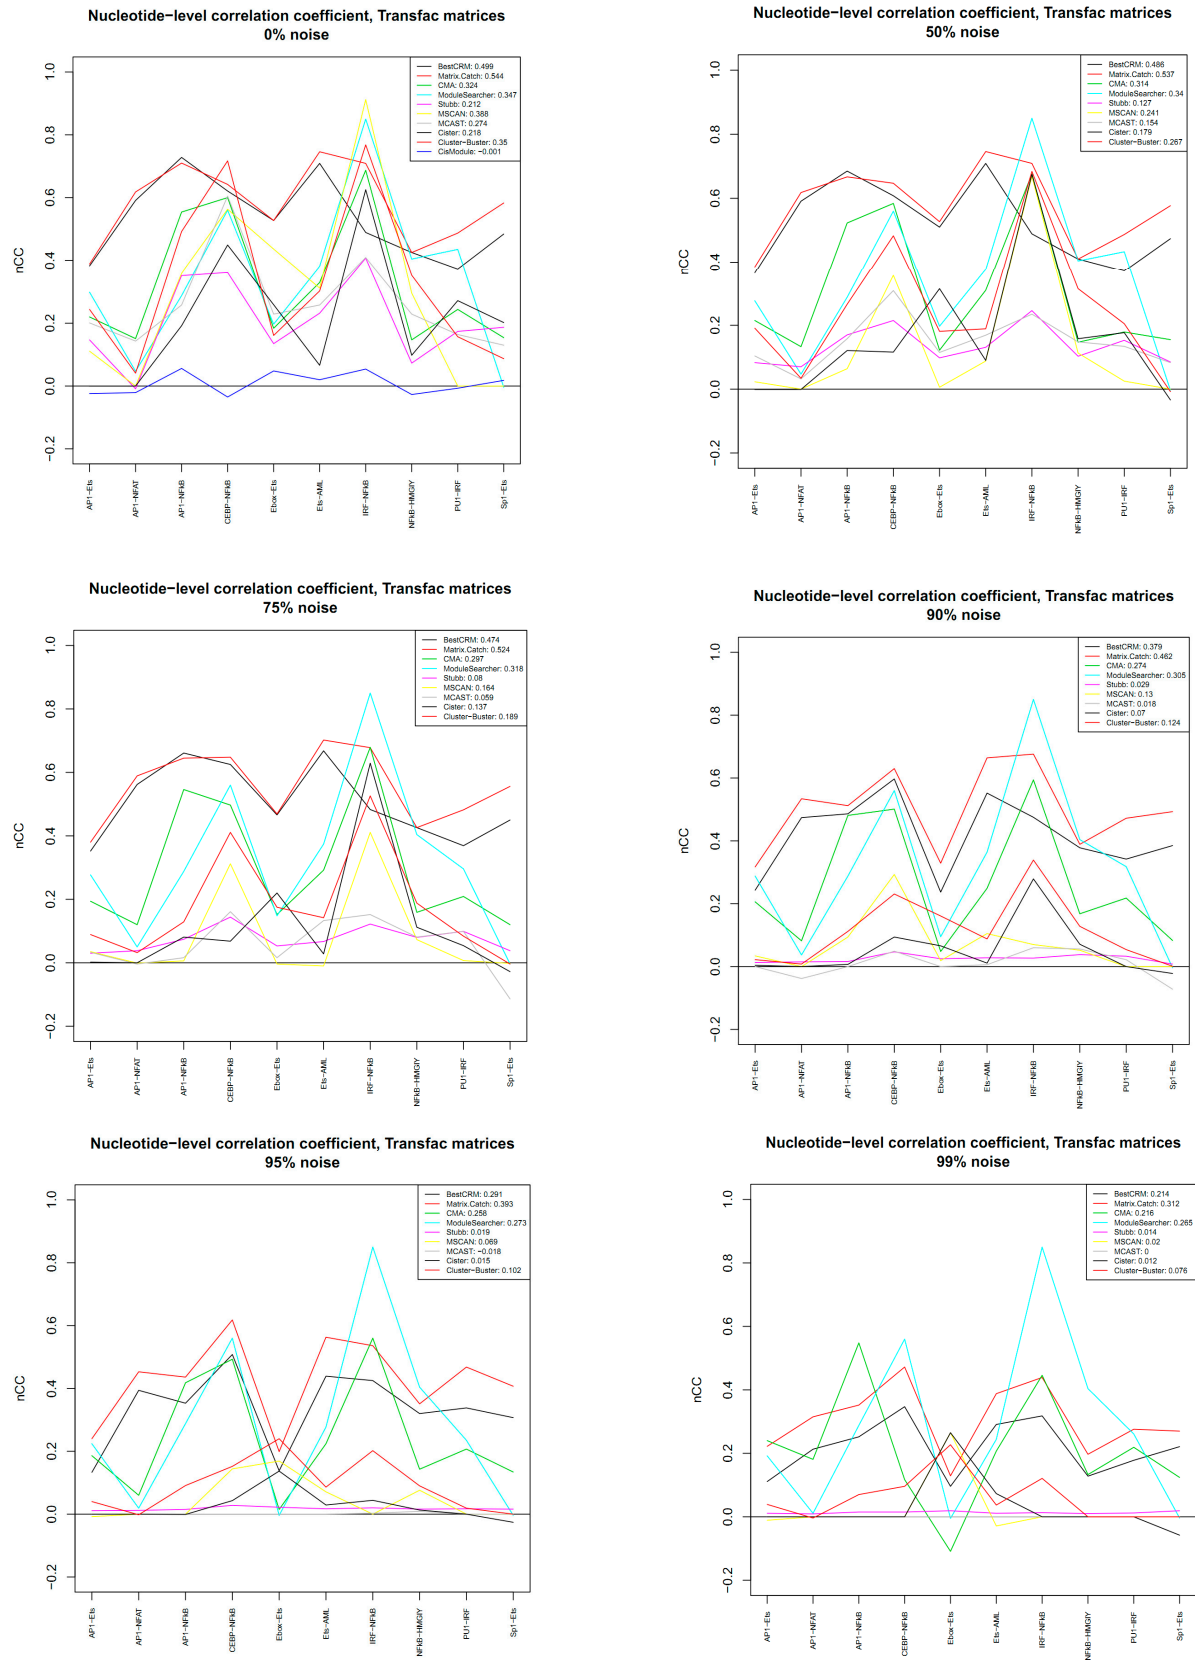



**Figure S3 (Continued).**

D. Performance by different noise levels in datasets.

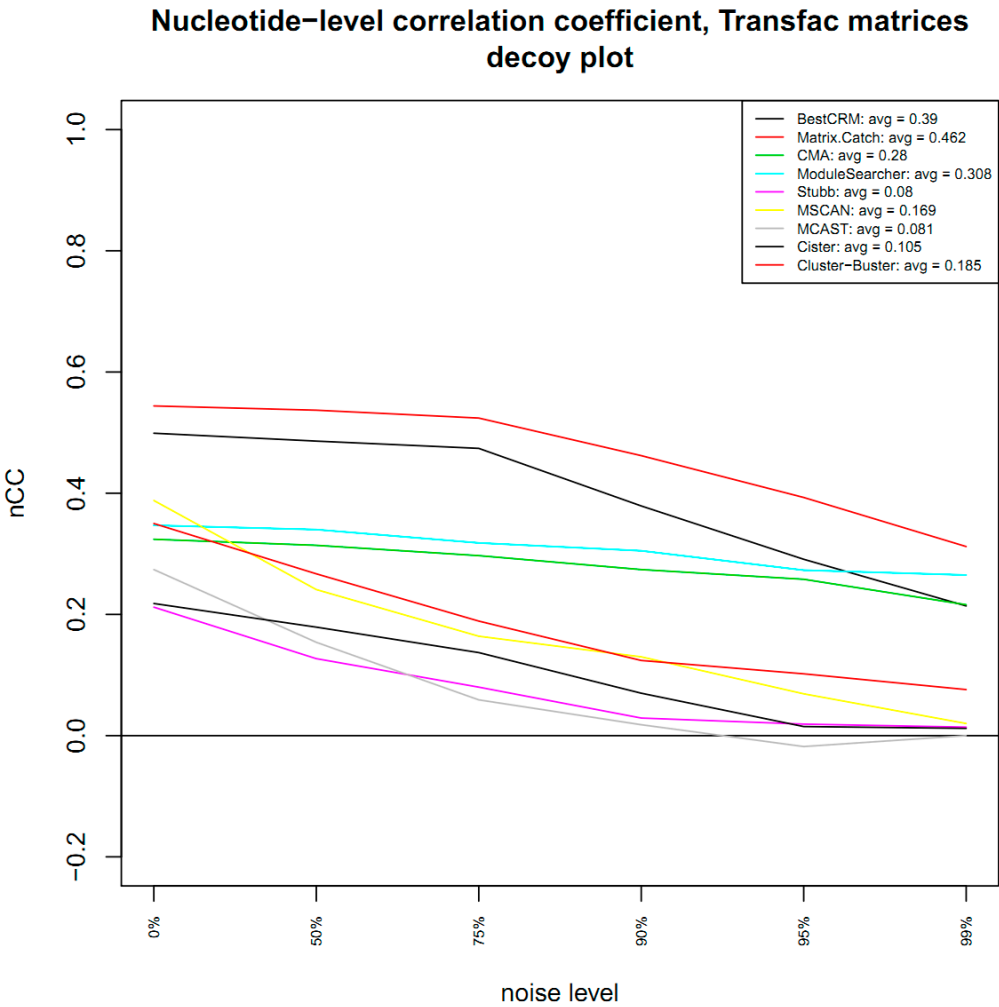

**Table S1.** Identification of CRMs in tissue-specific promoters by different programs.  
 $C^+$  – portion of promoters with at least one predicted CRM in positive dataset,  $C^-$  – in negative dataset. #CRMs – number of different CRMs identified.

| <b>BestCRM</b> |                                   |       |       |                                   |       |       |                                   |       |       |                                   |       |       |                                   |       |       |
|----------------|-----------------------------------|-------|-------|-----------------------------------|-------|-------|-----------------------------------|-------|-------|-----------------------------------|-------|-------|-----------------------------------|-------|-------|
| 500bp          | $C^+ \geq 0.90$ & $C^- \leq 0.50$ |       |       | $C^+ \geq 0.75$ & $C^- \leq 0.50$ |       |       | $C^+ \geq 0.66$ & $C^- \leq 0.50$ |       |       | $C^+ \geq 0.50$ & $C^- \leq 0.25$ |       |       | $C^+ \geq 0.33$ & $C^- \leq 0.15$ |       |       |
|                | $C^+$                             | $C^-$ | #CRMs |
| Breast         | 0.916                             | 0.458 | 1     | 0.792                             | 0.458 | 6     | 0.667                             | 0.321 | 18    | 0.500                             | 0.167 | 12    | 0.333                             | 0.074 | 16    |
| Cerebellum     | -                                 | -     | -     | -                                 | -     | -     | -                                 | -     | -     | -                                 | -     | -     | -                                 | -     | -     |
| Heart          | -                                 | -     | -     | 0.814                             | 0.489 | 1     | 0.676                             | 0.386 | 8     | 0.500                             | 0.227 | 1     | 0.349                             | 0.141 | 1     |
| Kidney         | -                                 | -     | -     | 0.765                             | 0.474 | 3     | 0.686                             | 0.379 | 13    | 0.510                             | 0.222 | 2     | 0.353                             | 0.123 | 5     |
| Liver          | -                                 | -     | -     | -                                 | -     | -     | -                                 | -     | -     | -                                 | -     | -     | -                                 | -     | -     |
| Muscle         | -                                 | -     | -     | -                                 | -     | -     | -                                 | -     | -     | -                                 | -     | -     | -                                 | -     | -     |
| Pancreas       | -                                 | -     | -     | 0.758                             | 0.481 | 2     | 0.672                             | 0.479 | 2     | -                                 | -     | -     | 0.397                             | 0.146 | 2     |
| Prostate       | 0.941                             | 0.442 | 1     | 0.778                             | 0.416 | 8     | 0.667                             | 0.304 | 7     | 0.500                             | 0.145 | 3     | 0.333                             | 0.073 | 5     |
| Spleen         | -                                 | -     | -     | -                                 | -     | -     | 0.682                             | 0.451 | 2     | 0.512                             | 0.236 | 1     | 0.38                              | 0.129 | 2     |
| Testes         | -                                 | -     | -     | -                                 | -     | -     | -                                 | -     | -     | -                                 | -     | -     | -                                 | -     | -     |
| Thyroid        | -                                 | -     | -     | 0.762                             | 0.491 | 1     | 0.662                             | 0.470 | 3     | -                                 | -     | -     | 0.376                             | 0.134 | 2     |
|                |                                   |       |       |                                   |       |       |                                   |       |       |                                   |       |       |                                   |       |       |
| 1Kb            | $C^+ \geq 0.90$ & $C^- \leq 0.50$ |       |       | $C^+ \geq 0.75$ & $C^- \leq 0.50$ |       |       | $C^+ \geq 0.66$ & $C^- \leq 0.50$ |       |       | $C^+ \geq 0.50$ & $C^- \leq 0.25$ |       |       | $C^+ \geq 0.33$ & $C^- \leq 0.15$ |       |       |
|                | $C^+$                             | $C^-$ | #CRMs |
| Breast         | 0.916                             | 0.458 | 1     | 0.792                             | 0.436 | 7     | 0.708                             | 0.356 | 16    | 0.500                             | 0.206 | 6     | 0.333                             | 0.069 | 14    |
| Cerebellum     | -                                 | -     | -     | -                                 | -     | -     | -                                 | -     | -     | -                                 | -     | -     | -                                 | -     | -     |
| Heart          | -                                 | -     | -     | -                                 | -     | -     | 0.721                             | 0.492 | 8     | -                                 | -     | -     | 0.338                             | 0.14  | 1     |
| Kidney         | -                                 | -     | -     | 0.765                             | 0.432 | 5     | 0.706                             | 0.390 | 12    | 0.510                             | 0.246 | 1     | 0.358                             | 0.128 | 2     |
| Liver          | -                                 | -     | -     | -                                 | -     | -     | -                                 | -     | -     | -                                 | -     | -     | -                                 | -     | -     |
| Muscle         | -                                 | -     | -     | -                                 | -     | -     | -                                 | -     | -     | -                                 | -     | -     | -                                 | -     | -     |
| Pancreas       | -                                 | -     | -     | 0.758                             | 0.462 | 1     | 0.672                             | 0.479 | 2     | 0.597                             | 0.196 | 1     | -                                 | -     | -     |
| Prostate       | 0.941                             | 0.489 | 1     | 0.833                             | 0.293 | 4     | 0.667                             | 0.161 | 8     | 0.667                             | 0.161 | 6     | 0.333                             | 0.063 | 9     |
| Spleen         | -                                 | -     | -     | -                                 | -     | -     | 0.663                             | 0.492 | 1     | -                                 | -     | -     | -                                 | -     | -     |
| Testes         | -                                 | -     | -     | -                                 | -     | -     | -                                 | -     | -     | -                                 | -     | -     | -                                 | -     | -     |
| Thyroid        | -                                 | -     | -     | 0.757                             | 0.486 | 1     | 0.662                             | 0.458 | 4     | -                                 | -     | -     | 0.338                             | 0.146 | 1     |
|                |                                   |       |       |                                   |       |       |                                   |       |       |                                   |       |       |                                   |       |       |
| 500bp          | $C^+ \geq 0.90$ & $C^- \leq 0.50$ |       |       | $C^+ \geq 0.75$ & $C^- \leq 0.50$ |       |       | $C^+ \geq 0.66$ & $C^- \leq 0.50$ |       |       | $C^+ \geq 0.50$ & $C^- \leq 0.25$ |       |       | $C^+ \geq 0.33$ & $C^- \leq 0.15$ |       |       |
|                | $C^+$                             | $C^-$ | #CRMs |
| Breast         | -                                 | -     | -     | 0.750                             | 0.391 | 17    | 0.667                             | 0.279 | 67    | 0.500                             | 0.168 | 20    | 0.333                             | 0.063 | 58    |
| Cerebellum     | -                                 | -     | -     | -                                 | -     | -     | -                                 | -     | -     | -                                 | -     | -     | -                                 | -     | -     |
| Heart          | -                                 | -     | -     | 0.765                             | 0.496 | 3     | 0.662                             | 0.382 | 16    | 0.500                             | 0.239 | 1     | 0.338                             | 0.141 | 1     |
| Kidney         | -                                 | -     | -     | 0.765                             | 0.479 | 3     | 0.667                             | 0.372 | 43    | 0.529                             | 0.235 | 4     | 0.333                             | 0.096 | 17    |
| Liver          | -                                 | -     | -     | -                                 | -     | -     | -                                 | -     | -     | -                                 | -     | -     | -                                 | -     | -     |
| Muscle         | -                                 | -     | -     | -                                 | -     | -     | -                                 | -     | -     | -                                 | -     | -     | -                                 | -     | -     |
| Pancreas       | -                                 | -     | -     | -                                 | -     | -     | 0.672                             | 0.402 | 8     | -                                 | -     | -     | 0.344                             | 0.145 | 3     |
| Prostate       | 0.941                             | 0.489 | 1     | 0.765                             | 0.305 | 47    | 0.706                             | 0.254 | 74    | 0.529                             | 0.071 | 47    | 0.353                             | 0.037 | 80    |
| Spleen         | -                                 | -     | -     | -                                 | -     | -     | -                                 | -     | -     | -                                 | -     | -     | -                                 | -     | -     |
| Testes         | -                                 | -     | -     | -                                 | -     | -     | -                                 | -     | -     | -                                 | -     | -     | -                                 | -     | -     |
| Thyroid        | -                                 | -     | -     | -                                 | -     | -     | 0.662                             | 0.410 | 6     | -                                 | -     | -     | -                                 | -     | -     |
|                |                                   |       |       |                                   |       |       |                                   |       |       |                                   |       |       |                                   |       |       |
| 1Kb            | $C^+ \geq 0.90$ & $C^- \leq 0.50$ |       |       | $C^+ \geq 0.75$ & $C^- \leq 0.50$ |       |       | $C^+ \geq 0.66$ & $C^- \leq 0.50$ |       |       | $C^+ \geq 0.50$ & $C^- \leq 0.25$ |       |       | $C^+ \geq 0.33$ & $C^- \leq 0.15$ |       |       |
|                | $C^+$                             | $C^-$ | #CRMs |
| Breast         | -                                 | -     | -     | 0.750                             | 0.359 | 25    | 0.667                             | 0.260 | 54    | 0.500                             | 0.167 | 26    | 0.333                             | 0.072 | 51    |
| Cerebellum     | -                                 | -     | -     | -                                 | -     | -     | -                                 | -     | -     | -                                 | -     | -     | -                                 | -     | -     |
| Heart          | -                                 | -     | -     | 0.750                             | 0.472 | 4     | 0.691                             | 0.417 | 23    | -                                 | -     | -     | 0.338                             | 0.130 | 1     |
| Kidney         | -                                 | -     | -     | 0.804                             | 0.495 | 5     | 0.667                             | 0.368 | 40    | -                                 | -     | -     | 0.333                             | 0.101 | 11    |
| Liver          | -                                 | -     | -     | -                                 | -     | -     | -                                 | -     | -     | -                                 | -     | -     | -                                 | -     | -     |
| Muscle         | -                                 | -     | -     | -                                 | -     | -     | 0.686                             | 0.481 | 1     | -                                 | -     | -     | -                                 | -     | -     |
| Pancreas       | -                                 | -     | -     | -                                 | -     | -     | 0.672                             | 0.399 | 8     | 0.508                             | 0.233 | 1     | 0.361                             | 0.141 | 4     |
| Prostate       | 0.941                             | 0.442 | 1     | 0.765                             | 0.328 | 47    | 0.706                             | 0.252 | 69    | 0.529                             | 0.107 | 39    | 0.412                             | 0.056 | 71    |
| Spleen         | -                                 | -     | -     | -                                 | -     | -     | -                                 | -     | -     | -                                 | -     | -     | -                                 | -     | -     |
| Testes         | -                                 | -     | -     | -                                 | -     | -     | -                                 | -     | -     | -                                 | -     | -     | -                                 | -     | -     |
| Thyroid        | -                                 | -     | -     | -                                 | -     | -     | 0.662                             | 0.475 | 2     | -                                 | -     | -     | -                                 | -     | -     |

Table S1. (continued)

| CMA            |                                               |                |       |                                               |                |       |                                               |                |       |                                               |                |       |                                               |                |       |
|----------------|-----------------------------------------------|----------------|-------|-----------------------------------------------|----------------|-------|-----------------------------------------------|----------------|-------|-----------------------------------------------|----------------|-------|-----------------------------------------------|----------------|-------|
| 500bp          | C <sup>+</sup> ≥ 0.90 & C <sup>-</sup> ≤ 0.50 |                |       | C <sup>+</sup> ≥ 0.75 & C <sup>-</sup> ≤ 0.50 |                |       | C <sup>+</sup> ≥ 0.66 & C <sup>-</sup> ≤ 0.50 |                |       | C <sup>+</sup> ≥ 0.50 & C <sup>-</sup> ≤ 0.25 |                |       | C <sup>+</sup> ≥ 0.33 & C <sup>-</sup> ≤ 0.15 |                |       |
|                | C <sup>+</sup>                                | C <sup>-</sup> | #CRMs |
| Breast         | -                                             | -              | -     | -                                             | -              | -     | 0.667                                         | 0.491          | 2     | -                                             | -              | -     | -                                             | -              | -     |
| Cerebellum     | -                                             | -              | -     | -                                             | -              | -     | -                                             | -              | -     | -                                             | -              | -     | -                                             | -              | -     |
| Heart          | -                                             | -              | -     | -                                             | -              | -     | -                                             | -              | -     | -                                             | -              | -     | -                                             | -              | -     |
| Kidney         | -                                             | -              | -     | -                                             | -              | -     | 0.667                                         | 0.456          | 2     | -                                             | -              | -     | -                                             | -              | -     |
| Liver          | -                                             | -              | -     | -                                             | -              | -     | -                                             | -              | -     | -                                             | -              | -     | -                                             | -              | -     |
| Muscle         | -                                             | -              | -     | -                                             | -              | -     | -                                             | -              | -     | -                                             | -              | -     | -                                             | -              | -     |
| Pancreas       | -                                             | -              | -     | -                                             | -              | -     | -                                             | -              | -     | -                                             | -              | -     | -                                             | -              | -     |
| Prostate       | -                                             | -              | -     | 0.765                                         | 0.408          | 5     | 0.765                                         | 0.408          | 5     | -                                             | -              | -     | 0.353                                         | 0.096          | 1     |
| Spleen         | -                                             | -              | -     | -                                             | -              | -     | -                                             | -              | -     | -                                             | -              | -     | -                                             | -              | -     |
| Testes         | -                                             | -              | -     | -                                             | -              | -     | -                                             | -              | -     | -                                             | -              | -     | -                                             | -              | -     |
| Thyroid        | -                                             | -              | -     | -                                             | -              | -     | -                                             | -              | -     | -                                             | -              | -     | -                                             | -              | -     |
|                |                                               |                |       |                                               |                |       |                                               |                |       |                                               |                |       |                                               |                |       |
| 1Kb            | C <sup>+</sup> ≥ 0.90 & C <sup>-</sup> ≤ 0.50 |                |       | C <sup>+</sup> ≥ 0.75 & C <sup>-</sup> ≤ 0.50 |                |       | C <sup>+</sup> ≥ 0.66 & C <sup>-</sup> ≤ 0.50 |                |       | C <sup>+</sup> ≥ 0.50 & C <sup>-</sup> ≤ 0.25 |                |       | C <sup>+</sup> ≥ 0.33 & C <sup>-</sup> ≤ 0.15 |                |       |
|                | C <sup>+</sup>                                | C <sup>-</sup> | #CRMs |
| Breast         | -                                             | -              | -     | -                                             | -              | -     | 0.667                                         | 0.405          | 4     | -                                             | -              | -     | -                                             | -              | -     |
| Cerebellum     | -                                             | -              | -     | -                                             | -              | -     | -                                             | -              | -     | -                                             | -              | -     | -                                             | -              | -     |
| Heart          | -                                             | -              | -     | -                                             | -              | -     | -                                             | -              | -     | -                                             | -              | -     | -                                             | -              | -     |
| Kidney         | -                                             | -              | -     | -                                             | -              | -     | 0.706                                         | 0.495          | 2     | -                                             | -              | -     | -                                             | -              | -     |
| Liver          | -                                             | -              | -     | -                                             | -              | -     | -                                             | -              | -     | -                                             | -              | -     | -                                             | -              | -     |
| Muscle         | -                                             | -              | -     | -                                             | -              | -     | -                                             | -              | -     | -                                             | -              | -     | -                                             | -              | -     |
| Pancreas       | -                                             | -              | -     | -                                             | -              | -     | -                                             | -              | -     | -                                             | -              | -     | -                                             | -              | -     |
| Prostate       | -                                             | -              | -     | 0.765                                         | 0.485          | 1     | 0.765                                         | 0.485          | 4     | -                                             | -              | -     | 0.353                                         | 0.057          | 4     |
| Spleen         | -                                             | -              | -     | -                                             | -              | -     | -                                             | -              | -     | -                                             | -              | -     | -                                             | -              | -     |
| Testes         | -                                             | -              | -     | -                                             | -              | -     | -                                             | -              | -     | -                                             | -              | -     | -                                             | -              | -     |
| Thyroid        | -                                             | -              | -     | -                                             | -              | -     | -                                             | -              | -     | -                                             | -              | -     | -                                             | -              | -     |
|                |                                               |                |       |                                               |                |       |                                               |                |       |                                               |                |       |                                               |                |       |
| ModuleSearcher |                                               |                |       |                                               |                |       |                                               |                |       |                                               |                |       |                                               |                |       |
| 500bp          | C <sup>+</sup> ≥ 0.90 & C <sup>-</sup> ≤ 0.50 |                |       | C <sup>+</sup> ≥ 0.75 & C <sup>-</sup> ≤ 0.50 |                |       | C <sup>+</sup> ≥ 0.66 & C <sup>-</sup> ≤ 0.50 |                |       | C <sup>+</sup> ≥ 0.50 & C <sup>-</sup> ≤ 0.25 |                |       | C <sup>+</sup> ≥ 0.33 & C <sup>-</sup> ≤ 0.15 |                |       |
|                | C <sup>+</sup>                                | C <sup>-</sup> | #CRMs |
| Breast         | -                                             | -              | -     | -                                             | -              | -     | 0.667                                         | 0.467          | 2     | -                                             | -              | -     | -                                             | -              | -     |
| Cerebellum     | -                                             | -              | -     | -                                             | -              | -     | -                                             | -              | -     | -                                             | -              | -     | -                                             | -              | -     |
| Heart          | -                                             | -              | -     | -                                             | -              | -     | -                                             | -              | -     | -                                             | -              | -     | -                                             | -              | -     |
| Kidney         | -                                             | -              | -     | -                                             | -              | -     | 0.725                                         | 0.479          | 8     | -                                             | -              | -     | 0.333                                         | 0.131          | 1     |
| Liver          | -                                             | -              | -     | -                                             | -              | -     | -                                             | -              | -     | -                                             | -              | -     | -                                             | -              | -     |
| Muscle         | -                                             | -              | -     | -                                             | -              | -     | 0.674                                         | 0.499          | 1     | -                                             | -              | -     | -                                             | -              | -     |
| Pancreas       | -                                             | -              | -     | -                                             | -              | -     | -                                             | -              | -     | -                                             | -              | -     | -                                             | -              | -     |
| Prostate       | -                                             | -              | -     | -                                             | -              | -     | 0.706                                         | 0.418          | 4     | -                                             | -              | -     | -                                             | -              | -     |
| Spleen         | -                                             | -              | -     | -                                             | -              | -     | -                                             | -              | -     | -                                             | -              | -     | -                                             | -              | -     |
| Testes         | -                                             | -              | -     | -                                             | -              | -     | -                                             | -              | -     | -                                             | -              | -     | -                                             | -              | -     |
| Thyroid        | -                                             | -              | -     | -                                             | -              | -     | 0.662                                         | 0.498          | 1     | -                                             | -              | -     | -                                             | -              | -     |
|                |                                               |                |       |                                               |                |       |                                               |                |       |                                               |                |       |                                               |                |       |
| 1Kb            | C <sup>+</sup> ≥ 0.90 & C <sup>-</sup> ≤ 0.50 |                |       | C <sup>+</sup> ≥ 0.75 & C <sup>-</sup> ≤ 0.50 |                |       | C <sup>+</sup> ≥ 0.66 & C <sup>-</sup> ≤ 0.50 |                |       | C <sup>+</sup> ≥ 0.50 & C <sup>-</sup> ≤ 0.25 |                |       | C <sup>+</sup> ≥ 0.33 & C <sup>-</sup> ≤ 0.15 |                |       |
|                | C <sup>+</sup>                                | C <sup>-</sup> | #CRMs |
| Breast         | -                                             | -              | -     | -                                             | -              | -     | 0.708                                         | 0.416          | 2     | 0.500                                         | 0.241          | 1.000 | 0.417                                         | 0.144          | 1     |
| Cerebellum     | -                                             | -              | -     | -                                             | -              | -     | -                                             | -              | -     | -                                             | -              | -     | -                                             | -              | -     |
| Heart          | -                                             | -              | -     | -                                             | -              | -     | 0.662                                         | 0.479          | 1     | -                                             | -              | -     | -                                             | -              | -     |
| Kidney         | -                                             | -              | -     | -                                             | -              | -     | 0.686                                         | 0.436          | 6     | -                                             | -              | -     | 0.333                                         | 0.148          | 4     |
| Liver          | -                                             | -              | -     | -                                             | -              | -     | -                                             | -              | -     | -                                             | -              | -     | -                                             | -              | -     |
| Muscle         | -                                             | -              | -     | -                                             | -              | -     | -                                             | -              | -     | -                                             | -              | -     | -                                             | -              | -     |
| Pancreas       | -                                             | -              | -     | -                                             | -              | -     | 0.672                                         | 0.471          | 1     | -                                             | -              | -     | -                                             | -              | -     |
| Prostate       | -                                             | -              | -     | 0.765                                         | 0.440          | 2     | 0.765                                         | 0.440          | 3     | -                                             | -              | -     | 0.353                                         | 0.142          | 1     |
| Spleen         | -                                             | -              | -     | -                                             | -              | -     | -                                             | -              | -     | -                                             | -              | -     | -                                             | -              | -     |
| Testes         | -                                             | -              | -     | -                                             | -              | -     | -                                             | -              | -     | -                                             | -              | -     | -                                             | -              | -     |
| Thyroid        | -                                             | -              | -     | -                                             | -              | -     | 0.662                                         | 0.474          | 1     | -                                             | -              | -     | -                                             | -              | -     |

**Table S1. (continued)**

[illegible]

**Figure S4. The problem of similar PWMs.**

Formally different PWMs in libraries, can represent very similar motifs (including its reverse complements). The problem is exemplified with application of PC-TraFF to breast dataset. Top 5 identified CRMs are presented.

| PC-TraFF Significant Pairs           |         |                      |
|--------------------------------------|---------|----------------------|
| Pairs                                | Z-Score | Reference            |
| V\$PU1_Q6 - V\$ETS_Q6 (info)         | 8.96628 | TRANSCompel, BioGRID |
| V\$ETS_Q4 - V\$ETS_Q6 (info)         | 5.59389 | TRANSCompel, BioGRID |
| V\$STAT6_01 - V\$CEBP_Q2_01 (info)   | 5.13913 | TRANSCompel, BioGRID |
| V\$STAT6_01 - V\$OCT_Q6 (info)       | 4.94159 |                      |
| V\$AP1_Q2_01 - V\$AP1_Q4_01 (info)   | 4.64285 | TRANSCompel, BioGRID |
| V\$AP1_C - V\$AP1_Q2_01 (info)       | 4.53015 | TRANSCompel, BioGRID |
| V\$SP1_Q6_01 - V\$SP1_Q2_01 (info)   | 4.32263 | TRANSCompel, BioGRID |
| V\$OCT_Q6 - V\$FOX_Q2 (info)         | 4.28302 |                      |
| V\$AP1_01 - V\$OCT_Q6 (info)         | 3.84685 | TRANSCompel          |
| V\$OCT_Q6 - V\$CEBP_Q2_01 (info)     | 3.82711 | BioGRID              |
| V\$CETS1P54_01 - V\$SP1_Q6_01 (info) | 3.78187 | TRANSCompel          |
| V\$SF1_Q6 - V\$ETS_Q6 (info)         | 3.69834 |                      |
| V\$CEBP_Q2_01 - V\$AP1_Q4_01 (info)  | 3.66405 | TRANSCompel, BioGRID |
| V\$AP1_Q6 - V\$AP1_Q4_01 (info)      | 3.65580 | TRANSCompel, BioGRID |
| V\$SOX9_B1 - V\$STAT6_01 (info)      | 3.65478 |                      |
| V\$GR_Q6_01 - V\$PR_Q2 (info)        | 3.63254 | TRANSCompel, BioGRID |
| V\$MYB_Q6 - V\$MYB_Q3 (info)         | 3.59763 |                      |
| V\$EGR_Q6 - V\$SP1_Q6_01 (info)      | 3.58168 | BioGRID              |
| V\$CEBPB_01 - V\$STAT6_01 (info)     | 3.57294 | TRANSCompel          |

CRM1:

| Pair Information |                                                                                     |                                                      |
|------------------|-------------------------------------------------------------------------------------|------------------------------------------------------|
| PWM              | Sequence Logo                                                                       | Linked TFs                                           |
| V\$PU1_Q6        |  | SP1                                                  |
| V\$ETS_Q6        |  | ELF1, ELF2, ELF4, ELK1, ELK3, ELK4, ERG, ETS1, ETS2, |

CRM2:

| Pair Information |               |                                                          |
|------------------|---------------|----------------------------------------------------------|
| PWM              | Sequence Logo | Linked TFs                                               |
| V\$ETS_Q4        |               | ELF1, ELF2, ELK1, ELK4, ERF, ERG, ETS1, ETS2, ETV7, FLI1 |
| V\$ETS_Q6        |               | ELF1, ELF2, ELF4, ELK1, ELK3, ELK4, ERG, ETS1, ETS2,     |

CRM3:

| Pair Information |               |                                   |
|------------------|---------------|-----------------------------------|
| PWM              | Sequence Logo | Linked TFs                        |
| V\$STAT6_01      |               | STAT6                             |
| V\$CEBP_Q2_01    |               | CEBPA, CEBPB, CEBPD, CEBPE, CEBPG |

CRM4:

| Pair Information |               |                                                                 |
|------------------|---------------|-----------------------------------------------------------------|
| PWM              | Sequence Logo | Linked TFs                                                      |
| V\$STAT6_01      |               | STAT6                                                           |
| V\$OCT_Q6        |               | POU2AF1, POU2F1, POU2F2, POU2F3, POU3F1, POU3F2, POU3F3, POU4F1 |

CRM5

| Pair Information |                                                                                   |                              |
|------------------|-----------------------------------------------------------------------------------|------------------------------|
| PWM              | Sequence Logo                                                                     | Linked TFs                   |
| V\$AP1_Q2_01     |  | FOS, FOSB, FOSL1, FOSL2, JUN |
| V\$AP1_Q4_01     |  | FOS, FOSB, FOSL1, FOSL2, JUN |
